# Supplementary material for: Enhanced Expression of miR-181b in B Cells of CLL Improves the Anti-Tumor Cytotoxic T Cell Response
Source: PubMed Central journal article supplement (PMC7826592; doi:10.3390/cancers13020257), 2021-01-12
Supplement: cancers-13-00257-s001.pdf [file cancers-13-00257-s001.pdf]

Supplementary materials

# Enhanced Expression of *miR-181b* in B Cells of CLL Improves the Anti-Tumor Cytotoxic T Cell Response

Mirco Di Marco <sup>1,2,†</sup>, Serena Veschi <sup>1,2,†</sup>, Paola Lanuti <sup>1,3</sup>, Alice Ramassone <sup>1,2</sup>, Stefania Pacillo <sup>1,2</sup>, Sara Pagotto <sup>1,2</sup>, Felice Pepe <sup>1,2</sup>, Jonahunnatha Nesson George-William <sup>1,2</sup>, Claudia Curcio <sup>1,3</sup>, Marco Marchisio <sup>1,3</sup>, Sebastiano Miscia <sup>3</sup>, Idanna Innocenti <sup>4</sup>, Francesco Autore <sup>4</sup>, Barbara Vannata <sup>4</sup>, Patrizia Di Gregorio <sup>5</sup>, Mario Di Gioacchino <sup>1,3</sup>, Silvia Valentinuzzi <sup>1,2</sup>, Manuela Iezzi <sup>1,3</sup>, Renato Mariani-Costantini <sup>1,2</sup>, Luigi Maria Larocca <sup>6</sup>, Luca Laurenti <sup>4</sup>, Angelo Veronese <sup>1,2</sup> and Rosa Visone <sup>1,2,\*</sup>

<sup>1</sup> Center for Advanced Studies and Technology (CAST), G. d'Annunzio University, 66100 Chieti, Italy; dma-mirco@gmail.com (M.D.M.); veschi@unich.it (S.V.); p.lanuti@unich.it (P.L.); alice.ramassone@unich.it (A.R.); stefania.pacillo28@gmail.com (S.P.); sara.pagotto@unich.it (S.P.); felixpepe@hotmail.it (F.P.); jonahnesson@gmail.com (J.N.G.-W.); claudia.curcio@unito.it (C.C.); m.marchisio@unich.it (M.M.); m.digioacchino@unich.it (M.D.G.); valentinuzzis@gmail.com (S.V.); miezzi@unich.it (M.I.); rmc@unich.it (R.M.-C.); a.veronese@unich.it (A.V.)

<sup>2</sup> Department of Medical, Oral and Biotechnological Sciences, G. d'Annunzio University, 66100 Chieti, Italy

<sup>3</sup> Department of Medicine and Aging Sciences, G. d'Annunzio University, 66100 Chieti, Italy; sebastiano.miscia@unich.it

<sup>4</sup> Fondazione Policlinico Universitario A. Gemelli IRCCS, 00168 Rome, Italy; idanna.innocenti@yahoo.it (I.I.); francesco\_autore@yahoo.it (F.A.); bvannata@hotmail.it (B.V.); Luca.Laurenti@unicatt.it (L.L.)

<sup>5</sup> Institute of Transfusion Medicine, "Ss. Annunziata" Hospital, 66100 Chieti, Italy; patrizia.digregorio@asl2abruzzo.it

<sup>6</sup> Institute of Pathological Anatomy, Fondazione Policlinico Universitario A. Gemelli IRCCS t, 00168 Rome, Italy; luigimaria.larocca@unicatt.it (L.M.L.)

\* Correspondence: r.visone@unich.it; Tel.: +39-0871-541498

† These authors contributed equally to this work.

**Citation:** Di Marco, M.; Veschi, S.; Lanuti, P.; Ramassone, A.; Pacillo, S.; Pagotto, S.; Pepe, F.; George-William, J.N.; Curcio, C.; Marchisio, M.; et al. Enhanced Expression of *miR-181b* in B Cells of CLL Improves the Anti-Tumor Cytotoxic T Cell Response. *Cancers* **2021**, *13*, 257. <https://doi.org/10.3390/cancers13020257>

Received: 12 December 2020

Accepted: 08 January 2021

Published: 12 January 2021

**Publisher's Note:** MDPI stays neutral with regard to jurisdictional claims in published maps and institutional affiliations.

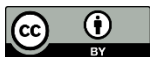

**Copyright:** © 2021 by the authors. Submitted for possible open access publication under the terms and conditions of the Creative Commons Attribution (CC BY) license (<http://creativecommons.org/licenses/by/4.0/>).

## Supplementary materials

**Table S1.** Characteristics of CLL patients included in the study. NA: no data available.

| ID patients | Sex | Age | IGHV homology | Zap-70   | WBC<br>(x10 <sup>9</sup> /liter) | ALC<br>(x10 <sup>9</sup> /liter) | Binet/Rai Stage |
|-------------|-----|-----|---------------|----------|----------------------------------|----------------------------------|-----------------|
| LLC3A       | M   | 82  | mutated       | negative | 80                               | 64                               | BII             |
| LLC5A       | M   | 59  | mutated       | negative | 50                               | 43                               | BII             |
| LLC15       | M   | 44  | unmutated     | negative | 11,5                             | 6,5                              | A0              |
| LLC18A      | F   | 77  | mutated       | positive | 82                               | 71                               | BII             |
| LLC18D      | F   | 78  | mutated       | positive | 87                               | 83                               | AII             |
| LLC20A      | M   | 57  | mutated       | negative | 31,6                             | 27,1                             | A0              |
| LLC28       | M   | 59  | mutated       | negative | 60                               | 55                               | BII             |
| LLC29       | M   | 82  | unmutated     | positive | 29,9                             | 24,1                             | A0              |
| LLC34A      | M   | 64  | mutated       | negative | 24,2                             | 19,6                             | BII             |
| LLC34E      | M   | 68  | mutated       | negative | 33,9                             | NA                               | BII             |
| LLC35       | F   | 56  | mutated       | negative | 34,3                             | 28,7                             | BII             |
| LLC35A      | F   | 57  | mutated       | negative | 23                               | 20                               | BII             |
| LLC39       | M   | 42  | mutated       | negative | 68                               | 61                               | BII             |
| LLC41       | F   | 68  | mutated       | negative | 40                               | 28,9                             | BII             |
| LLC42       | M   | 60  | mutated       | negative | 92                               | 78                               | BII             |
| LLC43       | M   | 78  | NA            | positive | 57                               | 47                               | A0              |
| LLC44       | F   | 70  | NA            | positive | 42                               | 36                               | BII             |
| LLC45A      | F   | 76  | unmutated     | negative | 60                               | 50                               | CIV             |
| LLC45B      | F   | 78  | unmutated     | negative | 56,6                             | 49,4                             | BII             |
| LLC46       | M   | 65  | unmutated     | positive | 37,2                             | 35                               | BII             |
| LLC46B      | M   | 69  | unmutated     | positive | 17,7                             | 13,3                             | BII             |
| LLC47       | F   | 67  | mutated       | negative | 15,3                             | 8,4                              | A0              |
| LLC47A      | F   | 71  | mutated       | negative | 24,5                             | 18,7                             | BII             |
| LLC48       | M   | 67  | unmutated     | negative | 33,4                             | 28,6                             | BII             |
| LLC51       | M   | 78  | mutated       | positive | 16                               | 13                               | BII             |
| LLC52       | M   | 73  | mutated       | negative | 29,1                             | 25,3                             | AII             |
| LLC52A      | M   | 74  | mutated       | negative | 22,6                             | 19,5                             | AII             |
| LLC52B      | M   | 74  | mutated       | negative | 33                               | 28                               | BII             |
| LLC53A      | F   | 73  | mutated       | negative | 26,5                             | 21,8                             | A0              |
| LLC58       | M   | 63  | mutated       | negative | 86                               | 67,6                             | AI              |
| LLC58A      | M   | 68  | mutated       | negative | 85                               | 79                               | BII             |
| LLC59       | F   | 62  | mutated       | negative | 34,3                             | 25,6                             | A0              |
| LLC62       | M   | 52  | unmutated     | negative | 24,0                             | NA                               | A0              |
| LLC62A      | M   | 52  | unmutated     | negative | 29,7                             | 23,2                             | BI              |
| LLC62B      | M   | 53  | unmutated     | negative | 49                               | 44                               | BI              |
| LLC67-8     | M   | 74  | mutated       | positive | 86,7                             | NA                               | NA              |
| LLC67-9     | M   | 70  | mutated       | positive | NA                               | NA                               | NA              |
| LLC70       | F   | 69  | unmutated     | positive | 72,7                             | 60,2                             | BII             |
| LLC70A      | F   | 69  | unmutated     | positive | 134                              | 125                              | BII             |
| LLC82       | M   | 52  | unmutated     | negative | 64,7                             | 52                               | AI              |
| LLC87       | F   | 53  | mutated       | negative | 43,4                             | 35                               | A0              |
| LLC87A      | F   | 54  | mutated       | negative | 37,2                             | 32,3                             | BII             |
| LLC88A      | M   | 68  | mutated       | NA       | 90                               | 72                               | BII             |
| LLC98       | M   | 78  | unmutated     | negative | 38,7                             | 30                               | BII             |
| LLC98A      | M   | 78  | unmutated     | negative | 82,8                             | 62                               | BII             |
| LLC105      | F   | 87  | mutated       | negative | 52                               | 43,7                             | BII             |
| LLC106      | M   | 67  | unmutated     | positive | 74,8                             | 63,6                             | BII             |
| LLC108      | F   | 62  | mutated       | positive | 52,3                             | 33                               | BII             |
| LLC108A     | F   | 63  | mutated       | positive | 109                              | 90                               | BII             |
| LLC129      | F   | 57  | mutated       | NA       | 77                               | 57,8                             | AI              |
| LLC130      | M   | 58  | mutated       | negative | 63,8                             | 53,4                             | BII             |
| LLC132      | M   | 63  | mutated       | NA       | 31,1                             | 24,8                             | A0              |
| LLC134      | F   | 72  | unmutated     | positive | 28                               | 20                               | A0              |
| LLC138      | F   | 68  | mutated       | negative | 48,1                             | 41,7                             | AI              |
| LLC150      | F   | 79  | mutated       | negative | 52,3                             | 46,4                             | AI              |
| LLC152      | M   | 75  | unmutated     | negative | 140                              | 102                              | BII             |
| LLC164      | M   | 48  | unmutated     | negative | 49                               | 40                               | AI              |
| LLC172      | M   | NA  | unmutated     | NA       | 65                               | 54                               | BII             |
| LLC176      | F   | 83  | NA            | NA       | 23,9                             | 17,3                             | A0              |
| LLC197      | F   | 66  | Mutated       | NA       | 128                              | NA                               | BII             |
| LLC198      | M   | NA  | NA            | NA       | NA                               | NA                               | NA              |

**Table S2.** Fluorochrome-conjugated reagents, antibodies and labeled probes used in the study.

| Antibody             | dilution | Vendor            | Cat. No.         | Technique |
|----------------------|----------|-------------------|------------------|-----------|
| Anti-CD5             | 1:30     | BD Biosciences    | 555353           | FC        |
| Anti-CD19            | 1:30     | BD Biosciences    | 555414           | FC        |
| Anti-CD19            | 1:30     | BD Biosciences    | 348814           | FC        |
| Anti-CD16            | 1:30     | Miltenyi Biotec   | 130-091-246      | FC        |
| Anti-CD45            | 1:15     | BD Biosciences    | 340910           | FC        |
| Anti-CD38            | 1:30     | BD Biosciences    | 345806           | FC        |
| Anti-CD38            | 1:30     | BD Biosciences    | 563251           | FC        |
| Anti-CD3             | 1:30     | Miltenyi Biotec   | 130-080-401      | FC        |
| Anti-CD3             | 1:30     | BD Biosciences    | 341111           | FC        |
| Anti-CD8             | 1:50     | BD Biosciences    | 555635           | FC        |
| Anti-CD8             | 1:50     | BD Biosciences    | 345775           | FC        |
| Anti-CD4             | 1:30     | Miltenyi Biotec   | 130-091-232      | FC        |
| Anti-CD95            | 1:50     | BD Biosciences    | 340481           | FC        |
| Anti-CD34            | 1:30     | Miltenyi Biotec   | 130-095-393      | FC        |
| Anti-CD40L           | 1:50     | Miltenyi Biotec   | 130-092-289      | FC        |
| Anti-Granzyme B      | 1:30     | BD Biosciences    | 563388           | FC        |
| Annex V              | 1:200    | Enzo Life Science | Alx-209-252-T100 | FC        |
| VPD 450              | 1:1000   | BD Biosciences    | 562158           | FC        |
| Vibrant Dye Cycle    | 1:750    | Life Technologies | V35003           | FC        |
| Anti-human CD40L     | 1:50     | Vinci Biochem     | ANC-353-020      | T/B       |
| Normal mouse IgG     | 1:20     | SCBT              | sc-2025          | T/B       |
| Scramble-miR control | 1:100    | Exiqon            | 99004-15         | ISH       |
| Hsa-pre-miR-181b     | 1:50     | Exiqon            | Custom           | ISH       |
| Hsa-miR-181b         | 1:100    | Exiqon            | 38488-15         | ISH       |
| Anti-Digoxigenin-AP  | 1:800    | Roche             | 11093274910      | ISH       |
| Anti-human CD3       | 1:50     | Dako              | M7254            | IHC       |
| Anti-human CD8       | 1:50     | Dako              | M7103            | IHC       |
| Anti-mouse           |          | Dako              | K4001            | IHC       |
| Anti-Granzyme B      | 1:50     | Leica Biosystem   | NCL-L-GRAN-B     | IHC       |
| Anti-FOS             | 1:200    | Invitrogen        | 38-4950          | WB        |
| Anti-β-actin         | 1:36000  | Cell Signalling   | 4967             | WB        |
| Anti-BCL2            | 1:1000   | Dako              | M0887            | WB        |
| Anti-γ-tubulin       | 1:400    | SCBT              | sc-7396          | WB        |
| Anti-mouse IgG       | 1:3000   | SCBT              | sc-2005          | WB        |
| Anti-goat IgG        | 1:3000   | SCBT              | sc-2020          | WB        |
| Anti-rabbit IgG      | 1:3000   | Biorad            | 1706515          | WB        |

FC: Flow Cytometry; T/B: lymphocytes T B interaction; ISH: In Situ Hybridization; IHC: Immunohistochemical; WB: Western Blot.

**Table S3.** Primers for reverse transcription (RT), quantitative PCR (qPCR) and cloning.

| Primer name  | Sequence                                              | Technique |
|--------------|-------------------------------------------------------|-----------|
| RT_U44       | GTTGGCTCTGGTGCAGGGTCCGAGGTATTCGCACCAGAGCCAACAG-TCAGTT | RT        |
| RT_181b      | GTTGGCTCTGGTGCAGGGTCCGAGGTATTCGCACCAGAGCCAACACCCAC    | RT        |
| RNU44_FW     | GCGGCGGCCTGGATGATGATAG                                | qPCR      |
| 181b_FW      | GCGGCGGAACATTCATTGCTG                                 | qPCR      |
| Universal_RV | GTGCAGGGTCCGAGGT                                      | qPCR      |
| CD95_FW      | ATGGCCAATTCTGCCATAAG                                  | qPCR      |
| CD95_RV      | TGACTGTGCAGTCCCTAGCTT                                 | qPCR      |
| FOS_FW       | ACTACCACTCACCCGCAGAC                                  | qPCR      |
| FOS_RV       | CCAGGTCCGTGCAGAAGT                                    | qPCR      |

|                            |                                                                                |         |
|----------------------------|--------------------------------------------------------------------------------|---------|
| IL10_FW                    | CATCGATTCTTCCCTGTGA                                                            | qPCR    |
| IL10_RV                    | CGTATCTTCATTGTCATGTAGGC                                                        | qPCR    |
| primiR-181b2               | TaqMan Pri-miRNA Assays (Applied Biosystem) Hs03303356_pri                     | RT-qPCR |
| StLoopSCNewXbaI-XhoI_5'    | AATTTCTAGACCGGGCGCGATAGCGCTAATAATTCACCTT-GAAATTATTAGCGCTATCGCGCTTTTCTCGAGTTAA  | Cloning |
| StLoopSCNew XbaI-XhoI_3'   | TTAACTCGAGAAAAAGCGCGATAGCGCTAA-TAATTTCAAGTCAAATTATTAGCGCTATCGCGCCCGGTCTAGAAATT | Cloning |
| miR-181b2 pos:127455984_FW | AATTTCTAGAAAACACTGATGGCTGCACTC                                                 | Cloning |
| miR-181b2 pos:127456078_RV | AATTGAGCTCTTGTTTGGTCCGCAGTTTGC                                                 | Cloning |

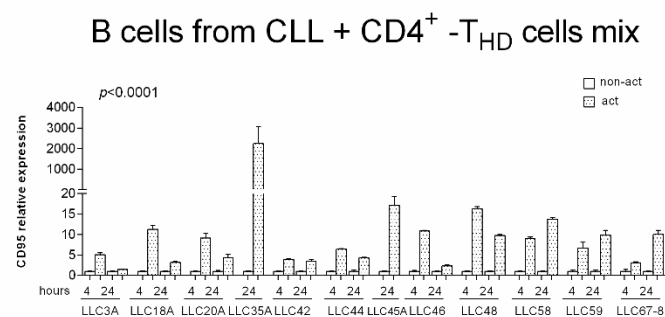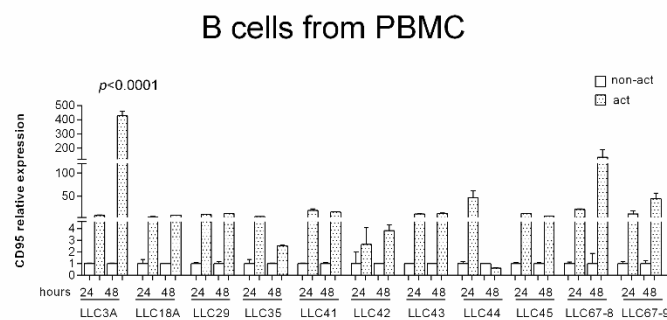

**Figure S1. Evaluation of CLL cells activation.** CLL cell activation was verified by RT-qPCR of *CD95* in (A) purified CLL cells co-cultured with activated vs. non-activated T cells, and (B) purified CLL cells isolated from activated or non-activated PBMCs from CLL patients. Relative expression values were determined by RT-qPCR; *CD95* data were normalized to the endogenous references *ACTB* with the  $2^{-\Delta\text{Act}}$  method. For each patient, the relative expression of *CD95* was normalized to the level of non-activated sample at 4 (A) or 24 (B) hours. Data are presented as mean  $\pm$  SEM and technical replicates are shown for each sample as black dot. *P*-values were calculated using Wilcoxon test in activated vs. non-activated CLL cells.

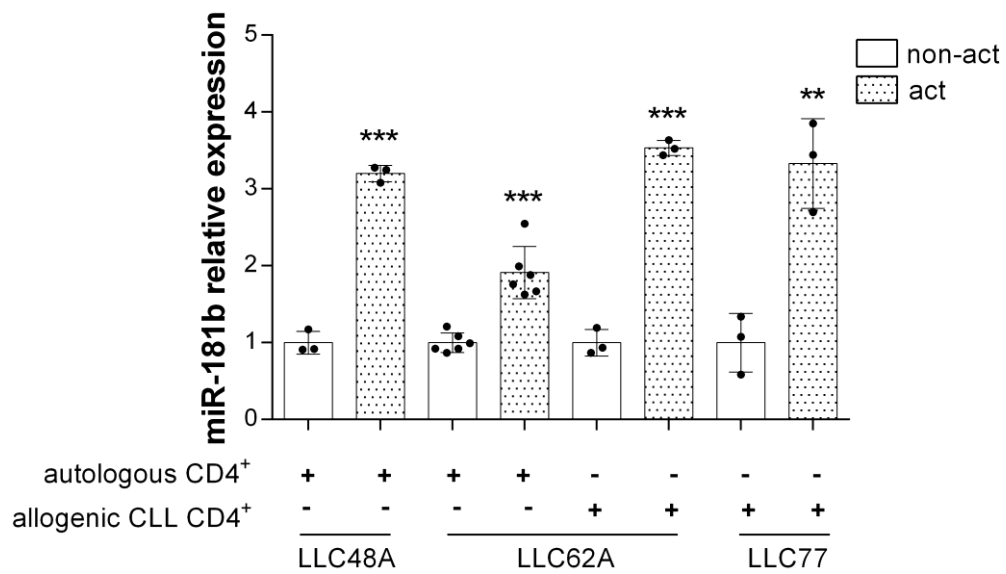

**Figure S2. Activated CD4<sup>+</sup> T cells from CLL patients retain the ability to increase the expression of *miR-181b* in CLL cells.** Relative expression (by RT-qPCR) of *miR-181b* in purified CLL cells after 24 h of co-culture with activated or non-activated CD4<sup>+</sup> T cells, either autologous (LLC48A and LLC62A) or CLL allogenic (LLC62A and LLC77). For each patient, the relative expression of *miR-181b* was normalized to the level of non-activated sample. Data are means  $\pm$  SEM and technical replicates are shown for each sample as black dot. \*\* $p < 0.01$ , \*\*\* $p < 0.001$  by Student's *t* test.

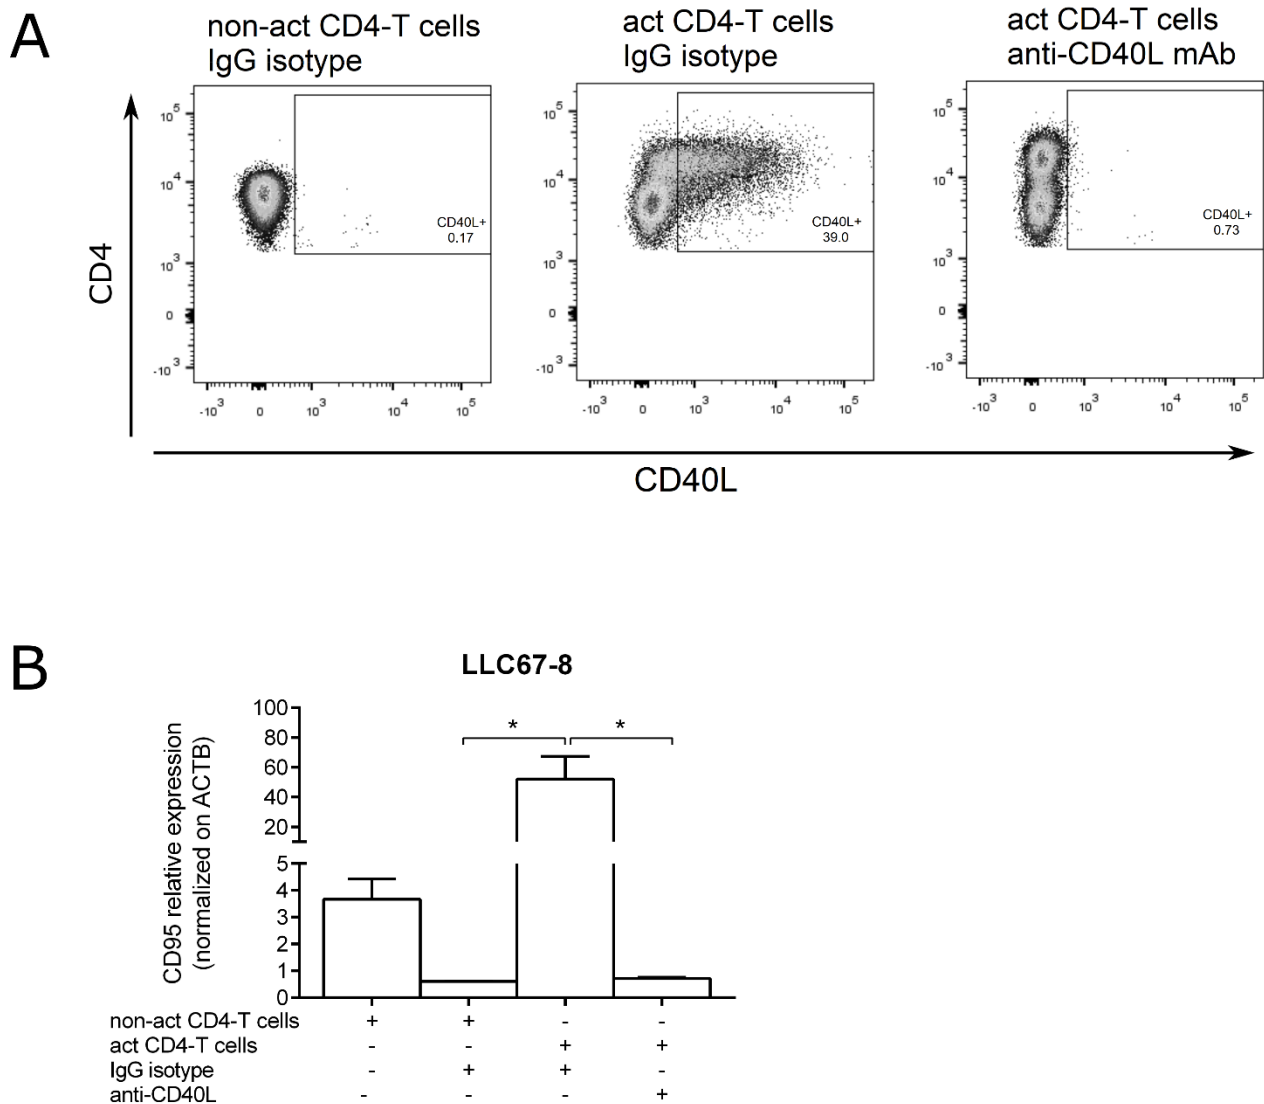

**Figure S3. Anti-CD40L mAb blocks the CD40L signaling.** A) Percentage of CD4<sup>+</sup>/CD40L<sup>+</sup> cells after activation of T cells from Healthy donor and treatment with anti-CD40L mAb or isotype control. B) Relative expression of CD95 in CLL patients (LLC67-8) showed in Figure 3. Relative expression values were determined by RT-qPCR; CD95 data were normalized to the endogenous references ACTB with the 2<sup>-Δct</sup> method. Data are presented as mean ± SEM. P-values were calculated using Student's t test (\*p < 0.05, \*\*p < 0.01 and \*\*\*p < 0.001).

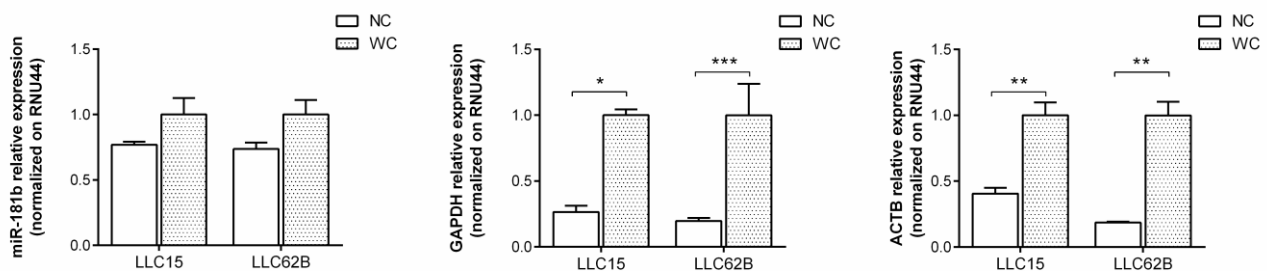

**Figure S4. MiR-181b expression in whole cell and nuclear compartments of B cells from CLL patients.** Expression levels (2<sup>Δct</sup> values) of miR-181b, ACTB and GAPDH in whole cell (WC) and

---

nuclear (NC) fractions of purified CLL cells from peripheral blood. Data were normalized to the endogenous nuclear reference *RNU44*; then, for each patient, the relative expression of *miR-181b*, *ACTB* and *GAPDH* was normalized to the level of whole cell sample. Data are means  $\pm$  SEM of technical triplicates. \* $p < 0.05$ , \*\* $p < 0.01$  and \*\*\* $p < 0.001$  by Student's *t* test

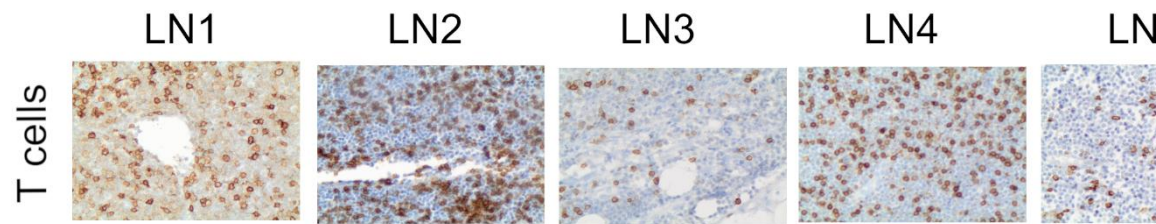

**Figure S5.** T cells staining in section from lymph node of CLL patients. Immunohistochemical analysis for CD5 (LN1) and CD3 (LN2, LN3, LN4, LN5) on lymph node sections from CLL patients, (400X magnification).

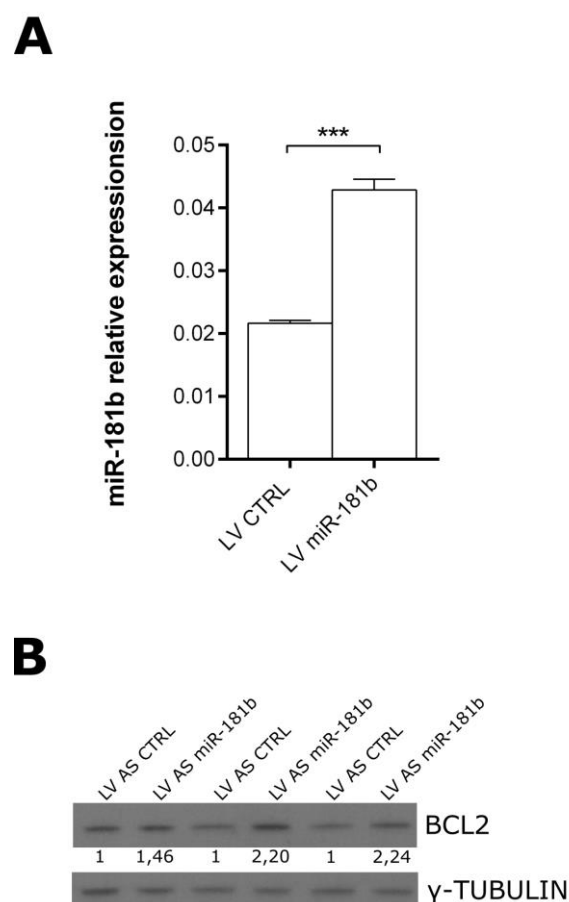

**Figure S6.** Controls of *miR-181b* expression and of its activity after ectopic transduction of LV *miR-181b* or LV AS *miR-181b* by lentiviruses technology. (A) Expression level of *miR-181b* in MEC-1 cells after 24 hours of infection with LV CTRL or LV *miR-181b*. Data were normalized to the endogenous reference *RNU44*; data are reported as mean  $\pm$  SEM of technical triplicates. \*\*\* $p < 0.001$  by Student's *t* test. (B) Western blot analysis of BCL2 and  $\gamma$ -TUBULIN in three different transfections of MEC-1 cells with LV AS CTRL or LV AS *miR-181b*. BCL2 protein levels were normalized to the levels of  $\gamma$ -TUBULIN; then, for each transfection, the relative level of BCL2 was normalized to the level of control sample (LV AS CTRL).



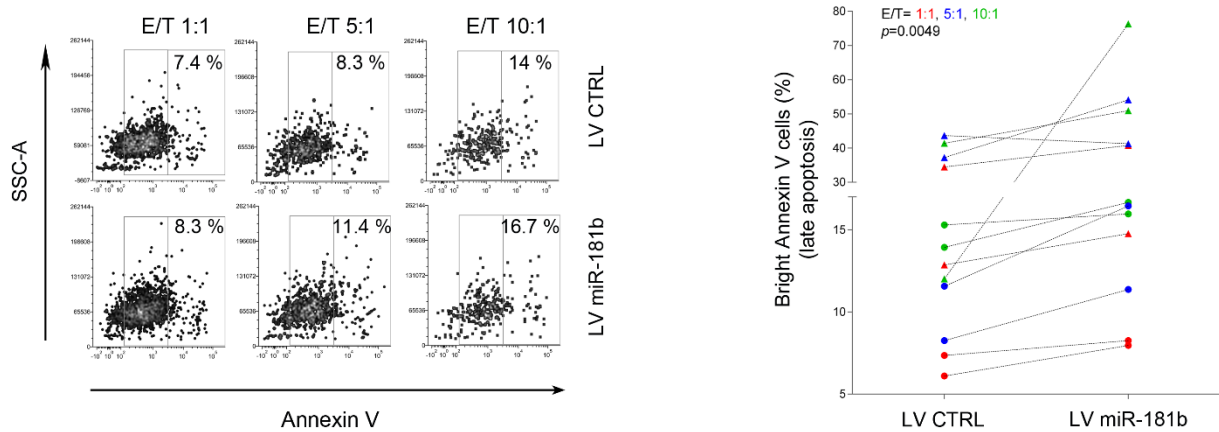

**Figure S7. MiR-181b promotes the death of leukemia cells.** Percentages of GFP+ /AnnV+ MEC-1 cells infected with either LV CTRL or LV miR-181b. Transduced MEC-1 cells were incubated with effector CD8+ T cells from healthy donors at various effector/target (E/T) ratios. After 4 or 7 hours late apoptosis was evaluated. (Left) Representative plots of four similar independent experiments are shown. (Right) Percentage of AnnV+ cells in late apoptosis (bright annexin) in samples from 4 experiments performed at various E/T ratio, 1:1 (red), 5:1 (blue), 10:1 (green), and at various time points, 4 hours (circles) and 7 hours (triangles). Significance between the two groups (LV CTRL vs LV miR-181b) was determined by Wilcoxon's signed rank test.

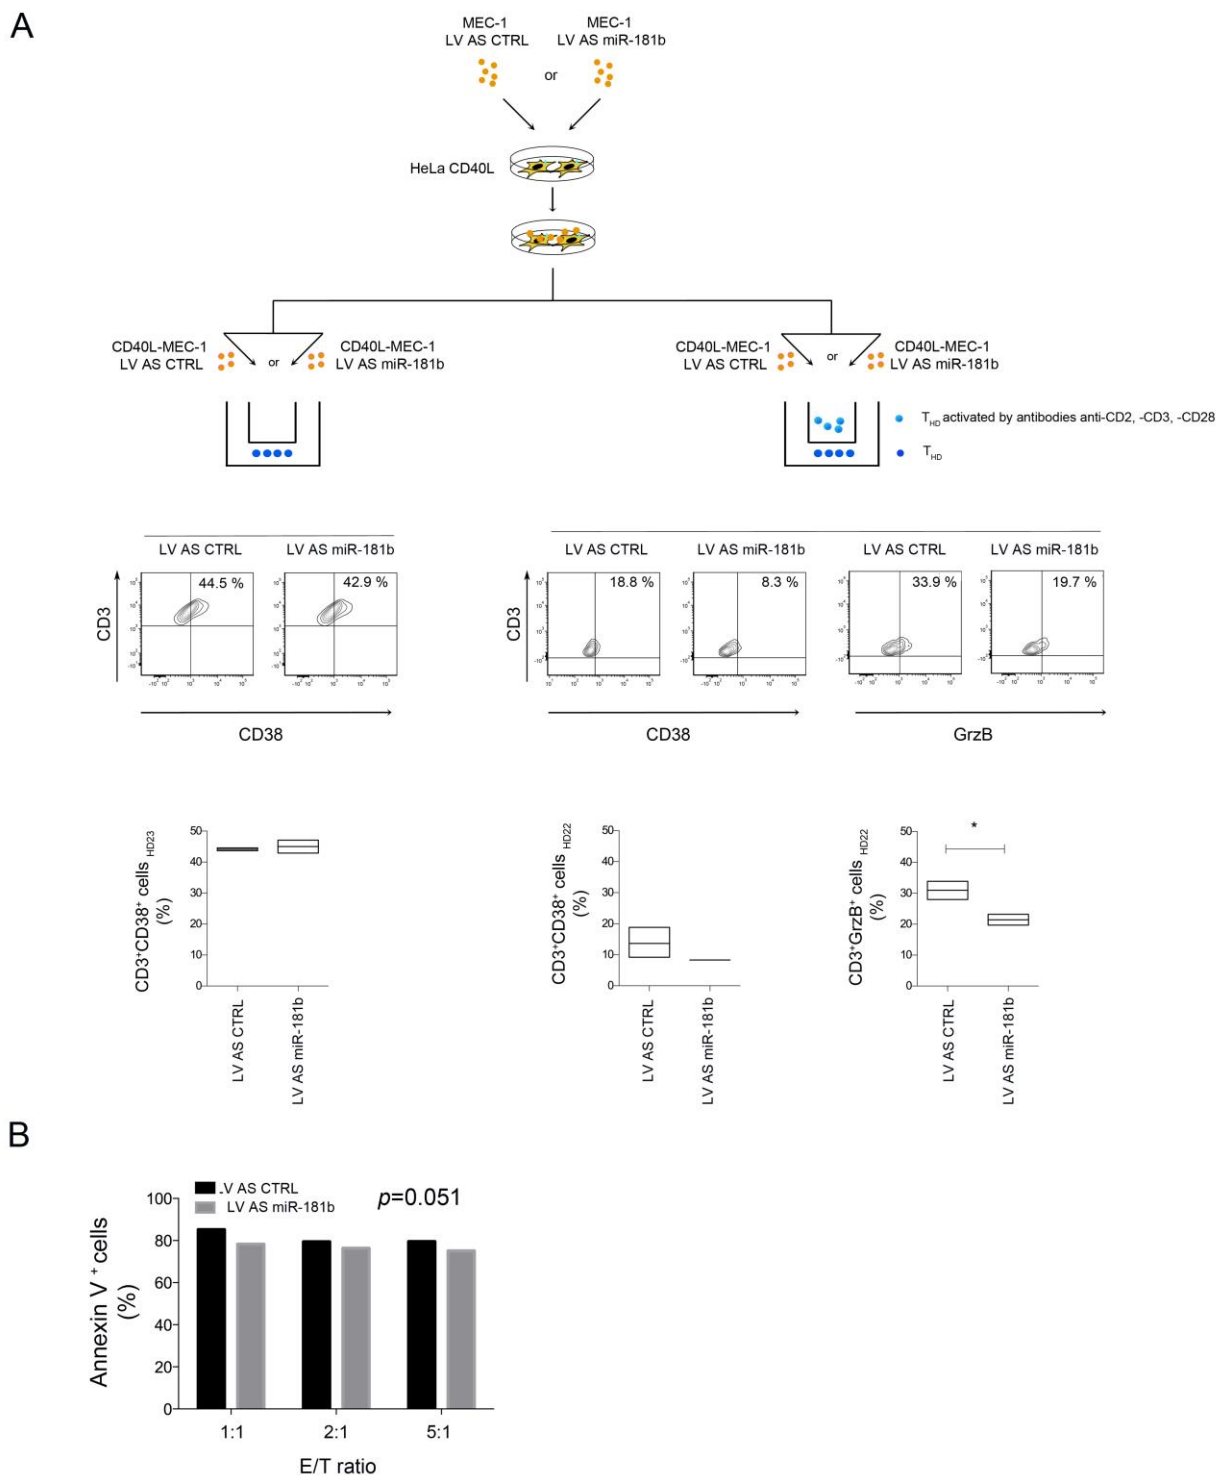

**Figure S8. Depletion of *miR-181b* from B cells reduces T cell activation and maturation.** (A) Percentage of CD3<sup>+</sup>/CD38<sup>+</sup> and CD3<sup>+</sup>/GrzB<sup>+</sup> from the lower transwell chamber. In the upper chamber, MEC-1 cells, infected with either LV AS miR181b or LV AS CTRL, were co-cultured with CD40L-HeLa. After 3 days, stimulated cells were grown with or without healthy activated T cells from healthy donor 22 (T<sub>HD22</sub>). In the lower chamber were seeded T cells from healthy donors 22 (T<sub>HD22</sub>) or 23 (T<sub>HD23</sub>) as indicated. Greater maturation of T<sub>HD23</sub> cells when directly mixed with MEC-1-LV AS CTRL than with LV AS miR181b was validated in a previous experiment (Fig.5B). Data are reported as floating bars (min to max) with the central line marking the mean of at least two

experimental replicates.  $*p < 0.05$  by Student's  $t$  test. (B) Percentage of fresh MEC-1 cells VPD<sup>+</sup>/Ann<sup>+</sup> after 2 h of co-culture. T cells from the healthy donor 22 (T<sub>HD22</sub>) were mixed with CD40L-activated MEC-1 cells transduced with either or LV AS miR181b or LV AS CTRL (E/T ratio, 2:1); the CTLs generated were then mixed with third-part fresh MEC-1 cells (E/T ratios, 1:1, 2:1, 5:1). Each bar reports a single value. Significance was assessed using the paired  $t$  test.

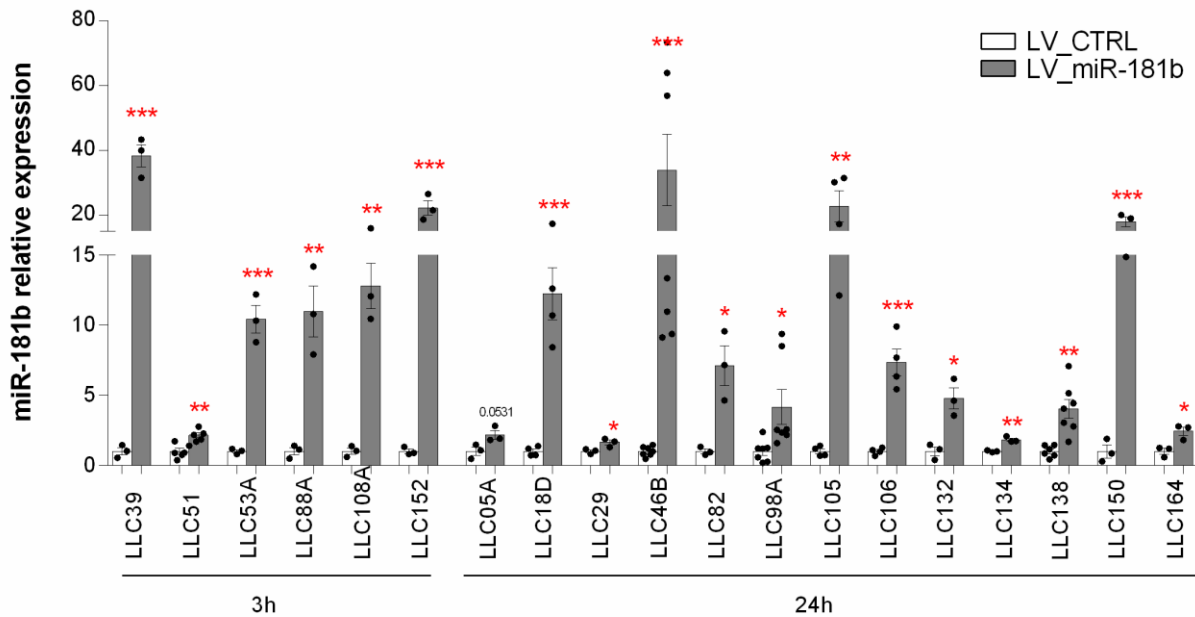

**Figure S9. Evaluation of CLL cells infection.** CLL cell infection was verified by RT-qPCR of *miR-181b* in purified CLL cells infected with LV miR-181b or LV CTRL; *miR-181b* expression was normalized to the endogenous references *RNU44* with the  $2^{-\Delta\Delta Ct}$  method. For each patient, the relative expression of *miR-181b* was normalized to the level of LV CTRL infected sample. Asterisks on each bar represents  $p$ -values calculated using Student's  $t$  test. Data are presented as mean  $\pm$  SEM and technical replicates are shown for each sample as black dot.  $*p < 0.05$ ,  $**p < 0.01$  and  $***p < 0.001$ .

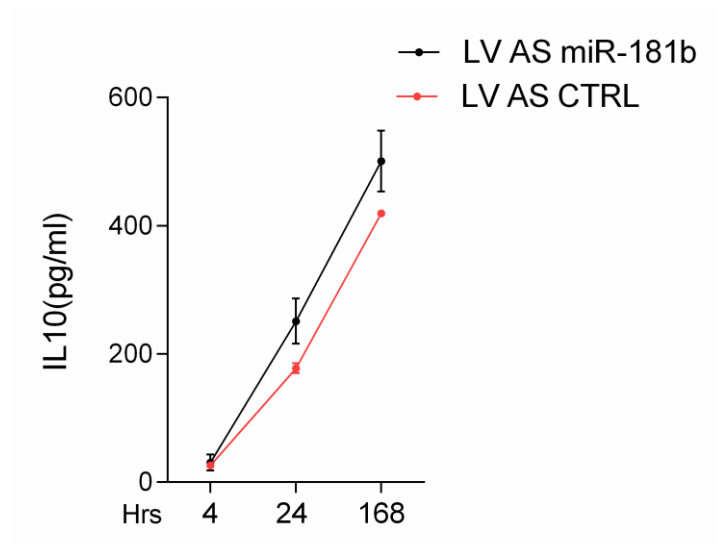

**Figure S10. Depletion of *miR-181b* in CLL cell line increases IL10 secretion.** ELISA determination of IL10 release in supernatant at 4, 24 and 168 hours from MEC-1 cells previously transduced with either LV AS *miR-181b* or LV AS CTRL and activated by HeLa cells expressing CD40L. Data are means  $\pm$  SEM of experimental duplicates.

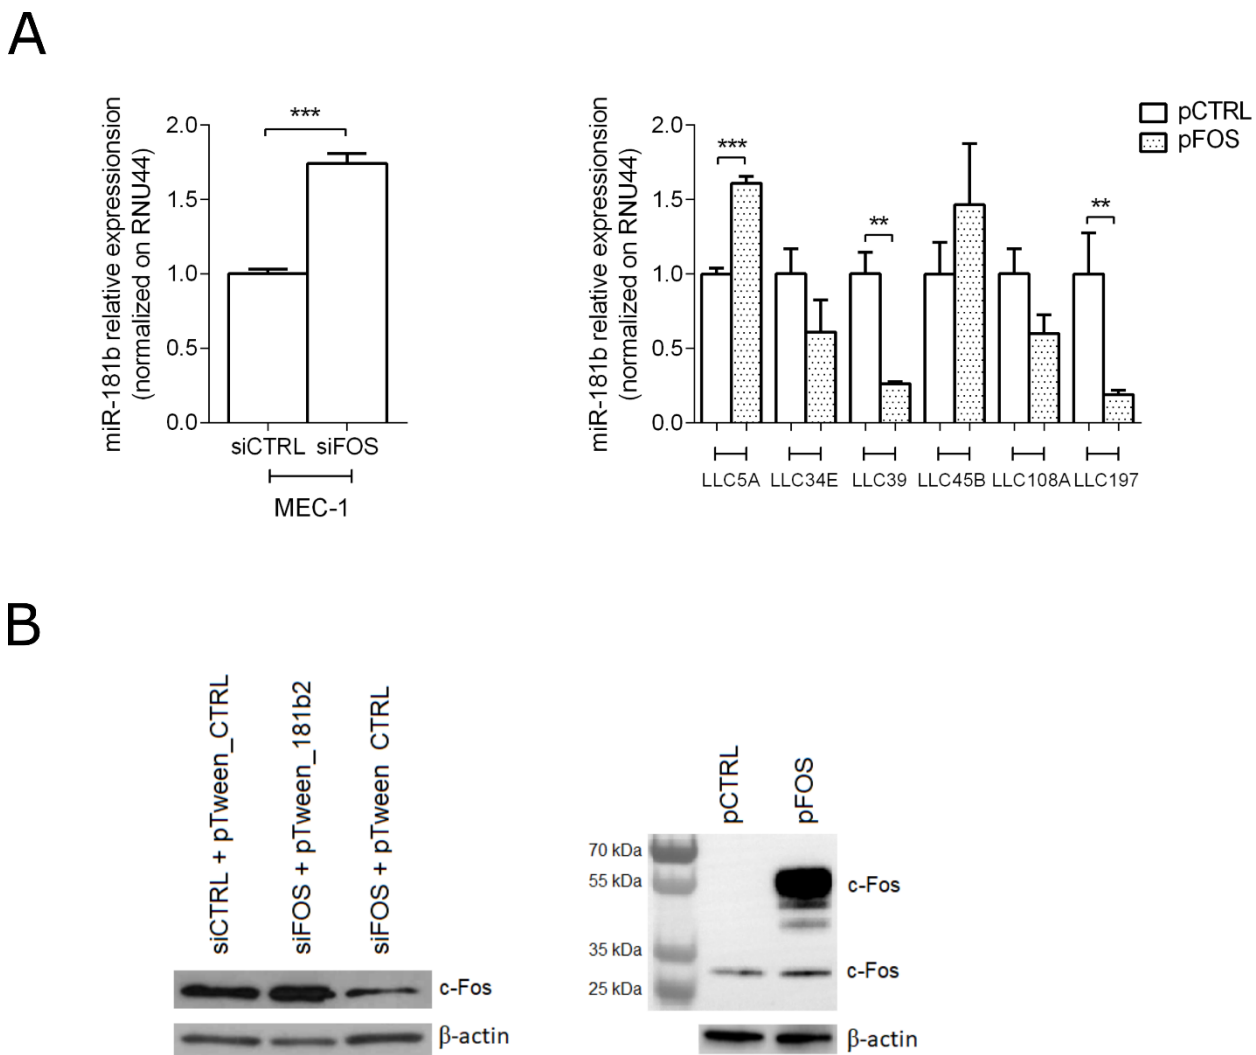

**Figure S11. C-Fos protein regulates miR-181b expression.** A) Relative expression of *miR-181b* by RT-qPCR in CLL cells after silencing (*left panel*) or overexpression (*right panel*) of *c-Fos*; *miR181b* expression was normalized to the endogenous reference *RNU44* with the  $2^{-\Delta\Delta Ct}$  method. Asterisks on each bar represents *p*-values calculated using Student's *t* test. B) Functional validation of siRNA-FOS (*left panel*) and pLX304-FOS-V5 (*right panel*, pFOS) in MEC-1 transfected cells; in our CLL cells, the molecular weight of the endogenous *c-Fos* is between 25 and 35 kDa (PageRuler Plus, ThermoScientific), while the molecular weight of the exogenous protein is around 55 kDa (PageRuler Plus, ThermoScientific). In the experiment reported in S11B left panel, the co-transfection of siFOS and pTwee\_181b2 increases *c-Fos* protein level, even though we expected a strong downregulation of *c-Fos* due to the synergic effect of *siFOS* and *miR-181b*. This could be due to a competition of the two RNAs for the binding of FOS-3'UTR, thus not allowing the right recruiting of the RISC complex.

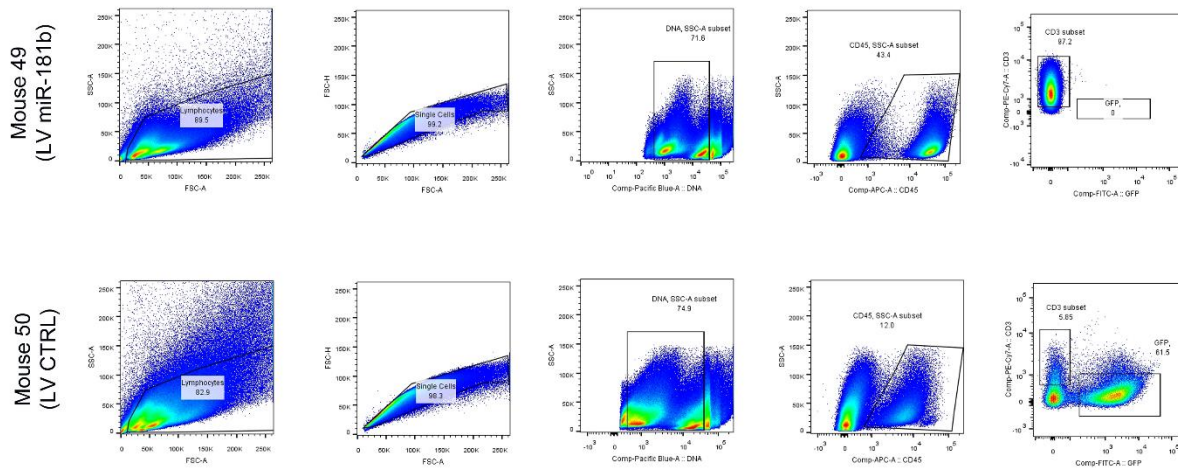

**Figure S12. Flow cytometry gating strategy in *in vivo* experiments.** Events showing the characteristic lymphocyte morphology were selected in a forward scatter (FSC-A) versus side scatter (SSC-A) plot (a). Next, single cells were identified (b) and dead cells were excluded based on the intensity staining of their nuclei (DNA positive, c). CD45 positive cell population was then gated (d) and analysed for CD3 surface expression and GFP (e). Representative plots of cells from bone marrow of mice inoculated with T cells and either MEC-1 carrying LV miR-181b (upper panel) or LV CTRL (lower panel).
